# Supplementary material
Source: PubMed Central journal article supplement (PMC8457759)
Supplement: mmc1.pdf [file mmc1.pdf]

# THE LANCET

## Healthy Longevity

### Supplementary appendix

This appendix formed part of the original submission and has been peer reviewed.  
We post it as supplied by the authors.

Supplement to: Lefèvre B, Tondeur L, Madec Y, et al. Beta SARS-CoV-2 variant and BNT162b2 vaccine effectiveness in long-term care facilities in France. *Lancet Healthy Longev* 2021; published online Sept 22. [https://doi.org/10.1016/S2666-7568\(21\)00230-0](https://doi.org/10.1016/S2666-7568(21)00230-0).

# **Impact of B.1.351 (Beta) SARS-CoV-2 variant on BNT162b2 mRNA vaccine effectiveness in long-term care facilities of eastern France**

## **Supplementary Appendix**

Supplementary Table 1. Characteristics of long-term care facility residents by RT-PCR test results and clinical forms of infection (n=376) included in the retrospective cohort study from 15 January to 19 May 2021

Supplementary Figure 1. Timing of BNT162b2 mRNA COVID-19 vaccination and B.1.351 outbreaks in LCTFs of eastern France.

Ethics statement

Funding statement

Acknowledgements

Supplementary Table 1. Characteristics of long-term care facility residents by RT-PCR test results and clinical forms of infection (n=376)\* included in the retrospective cohort study from 15 January to 19 May 2021

|                                      | PCR-negative     | B.1.351 infection |                 |
|--------------------------------------|------------------|-------------------|-----------------|
|                                      |                  | Mild              | Severe          |
|                                      | (N=233)<br>n (%) | (N=91)<br>n (%)   | (N=52)<br>n (%) |
| Sex                                  |                  |                   |                 |
| Male                                 | 50 (21.5)        | 18 (19.8)         | 23 (44.2)       |
| Female                               | 183 (78.5)       | 73 (80.2)         | 29 (55.8)       |
| Age (years)                          |                  |                   |                 |
| 55-84                                | 68 (29.2)        | 33 (36.3)         | 13 (25.0)       |
| 85-94                                | 136 (58.4)       | 46 (50.5)         | 36 (69.2)       |
| 94-104                               | 29 (12.4)        | 12 (13.2)         | 3 (5.8)         |
| History of past SARS-CoV-2 infection |                  |                   |                 |
| None                                 | 214 (91.9)       | 91 (100.0)        | 52 (100.0)      |
| Asymptomatic                         | 5 (2.1)          | 0 (0.0)           | 0 (0.0)         |
| Mild                                 | 7 (3.0)          | 0 (0.0)           | 0 (0.0)         |
| Severe                               | 5 (2.1)          | 0 (0.0)           | 0 (0.0)         |
| Unknown                              | 2 (0.9)          |                   |                 |
| Long-term care facility              |                  |                   |                 |
| A                                    | 30 (12.9)        | 18 (19.8)         | 23 (44.2)       |
| B                                    | 59 (25.3)        | 7 (7.7)           | 2 (3.9)         |
| C                                    | 21 (9.0)         | 17 (18.7)         | 4 (7.7)         |
| D                                    | 61 (26.2)        | 25 (27.4)         | 10 (19.2)       |
| E                                    | 62 (26.6)        | 24 (26.4)         | 13 (25.0)       |
| BNT162b2 mRNA COVID-19 vaccination   |                  |                   |                 |
| No vaccination                       | 22 (9.5)         | 5 (5.5)           | 13 (25.0)       |
| One dose of vaccine                  | 18 (7.7)         | 17 (18.7)         | 24 (46.1)       |
| Two doses of vaccine                 | 193 (82.8)       | 69 (75.8)         | 15 (28.9)       |

\*Two participants with positive RT-PCR test results, but variant screening RT-PCR test results missing (n=1) or undetermined (n=1), and not part of a cluster, are not shown

Figure 1. Timing of BNT162b2 mRNA COVID-19 vaccination and B.1.351 outbreaks in LCTFs of eastern France

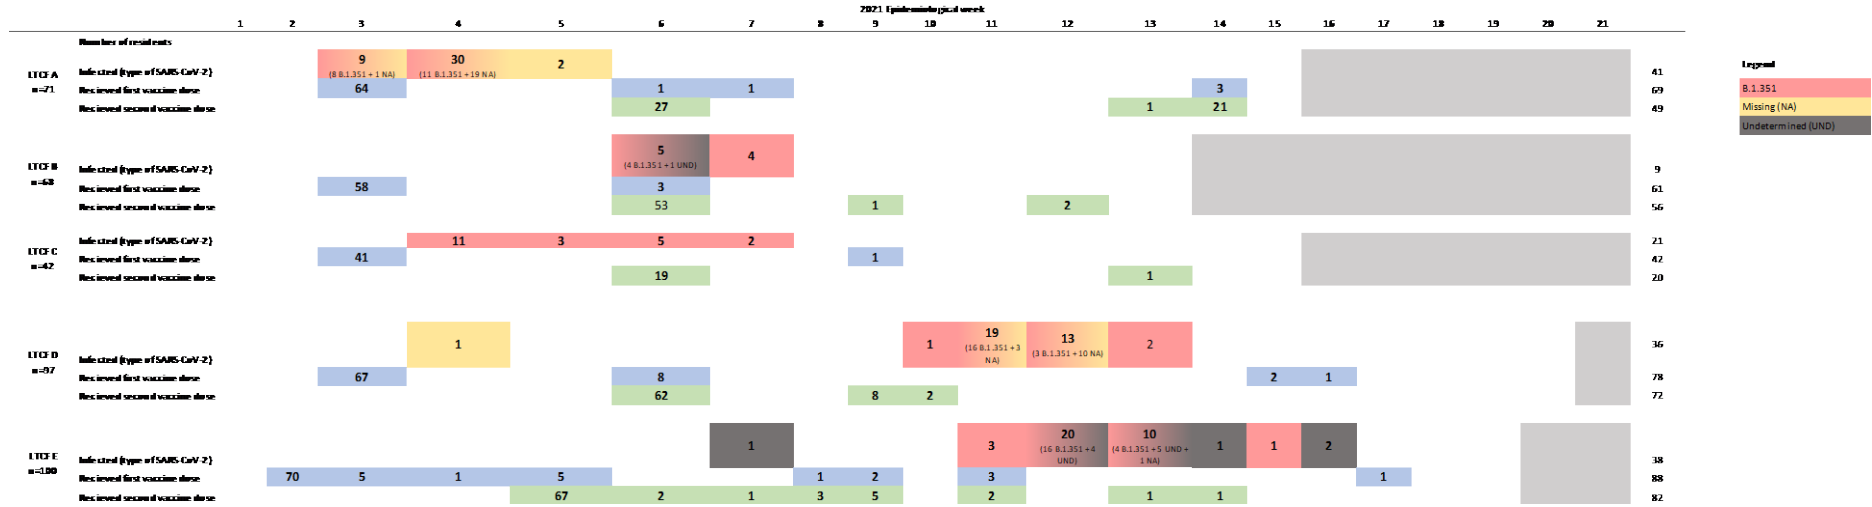

### Ethics statement

In France, surveillance of COVID-19 testing and COVID-19 vaccination data in LTCFs is considered as public health surveillance which does not require formal ethical review. The pseudonymized data collection by medical personnel at the LTCFs and analysis by the authors have been performed under the legal responsibility of the Société de Pathologie Infectieuse de Langue Française, which ensured compliance with data protection regulations in France.

### Funding statement

This study has benefited from financial support from the French Ministry of Health and Solidarity. The funder of the study had no role in study design, data collection, data analysis, data interpretation, or writing of the report.

### Acknowledgements

We would like to thank Professor Jérôme Salomon, Director General of Health in France, for facilitating this study. We would also like to thank all who were involved in this study: the Regional Health Agency of Grand-Est (Sandrine Guet, Jean-Pierre Gara, Olivier Dosso, Joël Restelli, Yves Le Balle, Franck Gerolt, Jean Le Moigne), the laboratory staff (Sebastien Fougnot, Jean Philippe Rault, Dominique Caby-Baer), the investigators from the long-term health care facilities (Mathilde Hemmer, Pauline Hannewald, Lola Antoine, Victoria Dennis, Camille Metzger, Elsa Remiatte, Alycia Layer, Emma Godard, Olivia Gouerec, Manon Nocus, Marie Di Sabatino, Ines Tabbone, Léa Willaume, Diego Caceres, Thibault Resch, Valentin Clément, Lucas Villemain, Quentin Garrouste, Aymeric Bernard), long-term care facility personnel (Dominique Huin, Laurence Zwahlen-Rolin, Caroline Guillotin, Céline Simonin, Sophie Hamel, Khadija Sghir, Jacqueline Genay, Marylin Guignard, Kathy Soriano, Emmanuelle Ulmer, Nathalie Muller, Emmanuelle Grossier, Christine Cornement, Marion Rosenau, Stéphanie Pietz, Magalie Jole, Céline Stickeir, Johnny Carpentier, Charles Sadoul, Jean-Maurice Demurger, Denis Gerber, Jean-Marc Roth, Arnaud Masson), and Laura Schaeffer who helped with set up of the questionnaire and the database.
